# Supplementary material for: Comparison between Macro and Trace Element Concentrations in Human Semen and Blood Serum in Highly Polluted Areas in Italy
Source: MDPI journal article supplement (doi:10.3390/ijerph191811635), 2022-09-15
Supplement: s1 [file s1]

## Supplementary Materials

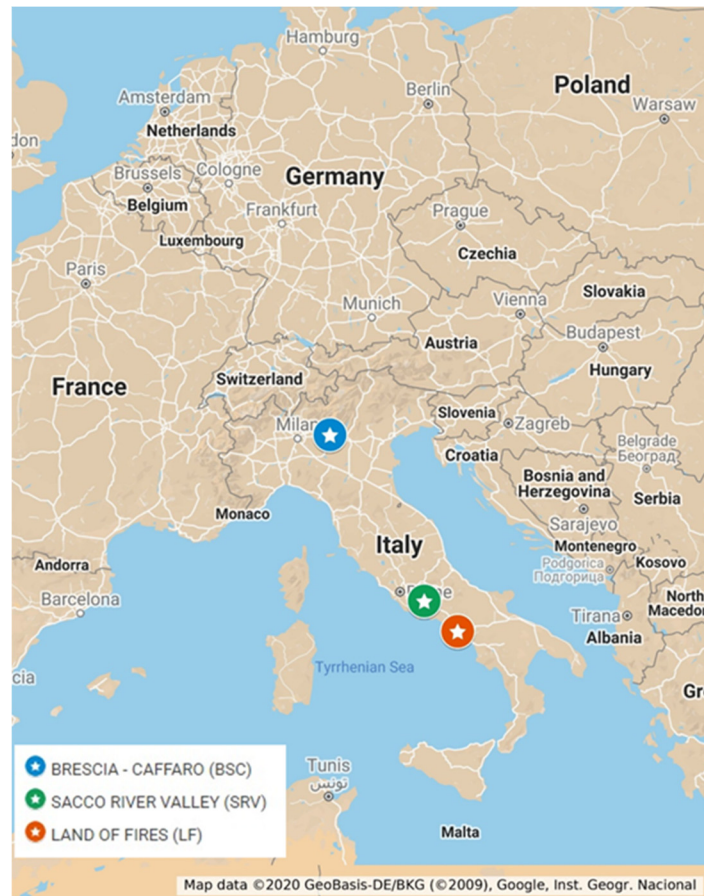

**Figure S1.** Map of the areas selected for the recruitment: SIN Brescia-Caffaro area (northern Italy, blue circle), SIN Sacco River Valley (central Italy, green circle) and the northern area of city of Naples, “Land of Fires” (southern Italy, orange circle).

**Table S1.** General characteristics of the study population reported for each area as mean value  $\pm$  standard deviation.

|                              | BSC             | LF              | SRV             | q value <sup>1</sup> |
|------------------------------|-----------------|-----------------|-----------------|----------------------|
| N                            | 144             | 137             | 51              | -                    |
| Age (year)                   | 20.0 $\pm$ 1.2  | 18.8 $\pm$ 1.3  | 18.2 $\pm$ 0.5  | 0.0001               |
| Weight (Kg)                  | 70.6 $\pm$ 9.0  | 71.6 $\pm$ 9.7  | 73.4 $\pm$ 8.7  | n.s.                 |
| Height (cm)                  | 177.3 $\pm$ 5.9 | 175.6 $\pm$ 6.5 | 177.3 $\pm$ 6.8 | n.s.                 |
| BMI (Kg m <sup>-2</sup> )    | 22.4 $\pm$ 2.3  | 23.2 $\pm$ 2.7  | 23.4 $\pm$ 3.0  | 0.0318               |
| Abdominal circumference (cm) | 83.5 $\pm$ 5.8  | 88.2 $\pm$ 7.2  | 83.0 $\pm$ 7.7  | 0.0001               |

<sup>1</sup>p-values were calculated with the Kruskal-Wallis Test; n.s.: not significant p value (>0.05)

**Table S2.** Lifestyle factors (PREDIMED and IPAQ scores) and semen quality parameters of subjects in each area reported as mean value  $\pm$  standard deviation

|                                                                 | BSC             | LF              | SRV             | q value <sup>1</sup> |
|-----------------------------------------------------------------|-----------------|-----------------|-----------------|----------------------|
| <b>PREDIMED score</b>                                           | 6.9 $\pm$ 2.1   | 7.4 $\pm$ 2.3   | 7.2 $\pm$ 2.5   | n.s.                 |
| <b>IPAQ score (Met)</b>                                         | 2380.4 $\pm$    | 2858.9 $\pm$    | 3414.6 $\pm$    | n.s.                 |
|                                                                 | 2105.7          | 3219.5          | 2729.0          |                      |
| <b>Volume (mL)</b>                                              | 2.9 $\pm$ 1.4   | 2.5 $\pm$ 1.1   | 2.9 $\pm$ 1.6   | n.s.                 |
| <b>pH</b>                                                       | 8.1 $\pm$ 0.4   | 7.9 $\pm$ 0.1   | 7.8 $\pm$ 0.2   | 0.0001               |
| <b>Spermatic concentration (10<sup>6</sup> ml<sup>-1</sup>)</b> | 67.3 $\pm$ 45.9 | 47.6 $\pm$ 32.7 | 52.3 $\pm$ 37.9 | 0.001                |
| <b>Total Motility (%)</b>                                       | 39.8 $\pm$ 20.0 | 42.7 $\pm$ 26.2 | 26.7 $\pm$ 21.6 | 0.0002               |
| <b>Progressive motility (%)</b>                                 | 27.1 $\pm$ 18.1 | 28.9 $\pm$ 20.5 | 16.8 $\pm$ 15.6 | 0.0008               |
| <b>Cells with normal morphology (%)</b>                         | 6.4 $\pm$ 4.4   | 7.1 $\pm$ 7.3   | 5.0 $\pm$ 3.2   | n.s.                 |

<sup>1</sup>p-values were calculated with the Kruskal-Wallis Test; n.s.: not significant p value (>0.05)

**Table S3.** Limit of detection (LOD) and limit of quantification (LOQ) in the final sample expressed in  $\mu\text{g/L}$ .

|            | Unit            | Ca  | Mg  | Na  | K   | Cu   | Fe  | Mn  | Ni   | Se  | Zn  | Al  | As  | Ba   |
|------------|-----------------|-----|-----|-----|-----|------|-----|-----|------|-----|-----|-----|-----|------|
| <b>LOD</b> | $\mu\text{g/L}$ | 200 | 200 | 200 | 200 | 4.4  | 3.4 | 0.4 | 4.2  | 1.1 | 1.8 | 1.2 | 0.2 | 6.6  |
| <b>LOQ</b> | $\mu\text{g/L}$ | 500 | 500 | 500 | 500 | 11.0 | 8.5 | 1.0 | 10.5 | 2.8 | 4.5 | 3.0 | 0.5 | 16.5 |
|            | Unit            | Be  | Cd  | Co  | Cr  | Hg   | Li  | Pb  | Rb   | Sb  | Sn  | Sr  | U   | V    |
| <b>LOD</b> | $\mu\text{g/L}$ | 2.6 | 0.2 | 0.4 | 0.8 | 0.2  | 0.4 | 0.1 | 3.0  | 0.2 | 0.2 | 0.2 | 0.2 | 1.8  |
| <b>LOQ</b> | $\mu\text{g/L}$ | 6.5 | 0.5 | 1.0 | 2.0 | 0.5  | 1.0 | 0.2 | 7.5  | 0.5 | 0.5 | 0.5 | 0.5 | 4.5  |

**Table S4.** Blood serum sample below limit of detection (LOD) expressed in %.

|           | Whole cohort |      | BSC |        | LF  |        | SRV |        |
|-----------|--------------|------|-----|--------|-----|--------|-----|--------|
|           | n            | %    | n   | median | n   | median | n   | median |
| <b>Ca</b> | 332          | 0    | 144 | 0      | 137 | 0      | 51  | 0      |
| <b>Mg</b> | 332          | 0    | 144 | 0      | 137 | 0      | 51  | 0      |
| <b>Na</b> | 332          | 0    | 144 | 0      | 137 | 0      | 51  | 0      |
| <b>K</b>  | 332          | 0    | 144 | 0      | 137 | 0      | 51  | 0      |
| <b>Cu</b> | 332          | 0    | 144 | 0      | 137 | 0      | 51  | 0      |
| <b>Mn</b> | 332          | 13,9 | 144 | 13,9   | 137 | 0      | 51  | 51,0   |
| <b>Ni</b> | 332          | 100  | 144 | 100    | 137 | 100    | 51  | 100    |
| <b>Se</b> | 332          | 0    | 144 | 0      | 137 | 0      | 51  | 0      |
| <b>Zn</b> | 332          | 0    | 144 | 0      | 137 | 0      | 51  | 0      |
| <b>Al</b> | 332          | 100  | 144 | 100    | 137 | 100    | 51  | 100    |
| <b>As</b> | 332          | 0    | 144 | 0      | 137 | 0      | 51  | 0      |
| <b>Ba</b> | 332          | 21,4 | 144 | 10,4   | 137 | 24,8   | 51  | 43,1   |
| <b>Be</b> | 332          | 78,0 | 144 | 76,4   | 137 | 72,3   | 51  | 98,0   |
| <b>Cd</b> | 332          | 56,6 | 144 | 72,9   | 137 | 37,2   | 51  | 62,8   |
| <b>Co</b> | 332          | 100  | 144 | 100    | 137 | 100    | 51  | 100    |
| <b>Cr</b> | 332          | 100  | 144 | 100    | 137 | 100    | 51  | 100    |
| <b>Hg</b> | 332          | 43,4 | 144 | 34,0   | 137 | 35,8   | 51  | 90,2   |
| <b>Li</b> | 332          | 2,5  | 144 | 5,6    | 137 | 0      | 51  | 0      |
| <b>Pb</b> | 332          | 4,2  | 144 | 5,6    | 137 | 4,4    | 51  | 0      |
| <b>Rb</b> | 332          | 0    | 144 | 0      | 137 | 0      | 51  | 0      |
| <b>Sb</b> | 332          | 12,0 | 144 | 4,9    | 137 | 17,5   | 51  | 17,6   |
| <b>Sn</b> | 332          | 15,4 | 144 | 33,3   | 137 | 0,73   | 51  | 3,9    |
| <b>Sr</b> | 332          | 0    | 144 | 0      | 137 | 0      | 51  | 0      |
| <b>U</b>  | 332          | 41,9 | 144 | 50,0   | 137 | 29,9   | 51  | 51,0   |
| <b>V</b>  | 332          | 100  | 144 | 100    | 137 | 100    | 51  | 100    |

**Table S5.** Semen sample below limit of detection (LOD) expressed in %.

|           | Whole cohort |      | BSC |        | LF  |        | SRV |        |
|-----------|--------------|------|-----|--------|-----|--------|-----|--------|
|           | n            | %    | n   | median | n   | median | n   | median |
| <b>Ca</b> | 268          | 0    | 113 | 0      | 100 | 0      | 55  | 0      |
| <b>Mg</b> | 268          | 0    | 113 | 0      | 100 | 0      | 55  | 0      |
| <b>Na</b> | 268          | 0    | 113 | 0      | 100 | 0      | 55  | 0      |
| <b>K</b>  | 268          | 0    | 113 | 0      | 100 | 0      | 55  | 0      |
| <b>Cu</b> | 268          | 0    | 113 | 0      | 100 | 0      | 55  | 0      |
| <b>Mn</b> | 268          | 0    | 113 | 0      | 100 | 0      | 55  | 0      |
| <b>Fe</b> | 268          | 0    | 113 | 0      | 100 | 0      | 55  | 0      |
| <b>Ni</b> | 268          | 40,7 | 113 | 3,5    | 100 | 93,0   | 55  | 21,8   |
| <b>Se</b> | 268          | 0    | 113 | 0      | 100 | 0      | 55  | 0      |
| <b>Zn</b> | 268          | 0    | 113 | 0      | 100 | 0      | 55  | 0      |
| <b>Al</b> | 268          | 100  | 113 | 100    | 100 | 100    | 55  | 100    |
| <b>As</b> | 268          | 0,37 | 113 | 0,88   | 100 | 0      | 55  | 0      |
| <b>Ba</b> | 268          | 23,9 | 113 | 56,6   | 100 | 0      | 55  | 0      |
| <b>Be</b> | 268          | 72,0 | 113 | 65,5   | 100 | 67,0   | 55  | 94,6   |
| <b>Cd</b> | 268          | 94,8 | 113 | 87,6   | 100 | 100    | 55  | 100    |
| <b>Co</b> | 268          | 100  | 113 | 100    | 100 | 100    | 55  | 100    |
| <b>Cr</b> | 268          | 100  | 113 | 100    | 100 | 100    | 55  | 100    |
| <b>Hg</b> | 268          | 33,3 | 113 | 20,4   | 100 | 19,0   | 55  | 70,9   |
| <b>Li</b> | 268          | 0,37 | 113 | 0,88   | 100 | 0      | 55  | 0      |
| <b>Pb</b> | 268          | 4,1  | 113 | 9,7    | 100 | 0      | 55  | 0      |
| <b>Rb</b> | 268          | 0    | 113 | 0      | 100 | 0      | 55  | 0      |
| <b>Sb</b> | 268          | 60,4 | 113 | 41,6   | 100 | 66,0   | 55  | 89,1   |
| <b>Sn</b> | 268          | 3,0  | 113 | 0,88   | 100 | 6,0    | 55  | 1,8    |
| <b>Sr</b> | 268          | 0    | 113 | 0      | 100 | 0      | 55  | 0      |
| <b>U</b>  | 268          | 97,0 | 113 | 96,5   | 100 | 96,0   | 55  | 100    |
| <b>V</b>  | 268          | 100  | 113 | 100    | 100 | 100    | 55  | 100    |

**Table S6.** Precision, accuracy and recovery data evaluated on blood serum samples.

|           | <b>Unit</b> | <b>C<sub>obs</sub></b> | <b>C<sub>spike</sub></b> | <b>CV%</b> | <b>Rec %</b> |
|-----------|-------------|------------------------|--------------------------|------------|--------------|
| <b>Ca</b> | mg/L        | 187                    | -                        | 5.6        | -            |
| <b>Mg</b> | mg/L        | 35.2                   | -                        | 9.0        | -            |
| <b>Na</b> | mg/L        | 227                    | -                        | 2.8        | -            |
| <b>K</b>  | mg/L        | 4392                   | -                        | 4.8        | -            |
| <b>Cu</b> | µg/L        | 60.4                   | 100                      | 20         | 81           |
| <b>Mn</b> | µg/L        | -                      | 100                      | 28         | 92           |
| <b>Ni</b> | µg/L        | 8.8                    | 100                      | 22         | 112          |
| <b>Se</b> | µg/L        | 3.6                    | 100                      | 14         | 80           |
| <b>Zn</b> | µg/L        | 37.4                   | 100                      | 7.0        | 96           |
| <b>Al</b> | µg/L        | -                      | 100                      | 11         | 104          |
| <b>As</b> | µg/L        | -                      | 100                      | 25         | 85           |
| <b>Ba</b> | µg/L        | -                      | 100                      | 13         | 116          |
| <b>Be</b> | µg/L        | -                      | 100                      | 19         | 98           |
| <b>Cd</b> | µg/L        | -                      | 100                      | 21         | 93           |
| <b>Co</b> | µg/L        | -                      | 100                      | 11         | 82           |
| <b>Cr</b> | µg/L        | -                      | 100                      | 12         | 107          |
| <b>Hg</b> | µg/L        | 0.8                    | 100                      | 27         | 95           |
| <b>Li</b> | µg/L        | 12.2                   | 100                      | 16         | 116          |
| <b>Pb</b> | µg/L        | -                      | 100                      | 17         | 93           |
| <b>Rb</b> | µg/L        | 11.1                   | 100                      | 23         | 116          |
| <b>Sr</b> | µg/L        | 1.3                    | 100                      | 25         | 118          |
| <b>V</b>  | µg/L        | -                      | 100                      | 14         | 119          |

<sup>1</sup> C<sub>obs</sub>, observed concentration in unfortified blood serum sample<sup>2</sup> C<sub>spike</sub>, known added spiked concentration<sup>3</sup> CV%, mean value of coefficient of variation<sup>4</sup> Rec%, mean recovery based on spiked concentration

**Table S7.** Precision, accuracy and recovery data evaluated on semen samples.

|           | Unit | C <sub>obs</sub> | C <sub>spike</sub> | CV% | Rec % |
|-----------|------|------------------|--------------------|-----|-------|
| <b>Cu</b> | µg/L | 8.0              | 100                | 24  | 90    |
| <b>Mn</b> | µg/L | 0.9              | 100                | 25  | 86    |
| <b>Ni</b> | µg/L | -                | 100                | 2   | 105   |
| <b>Se</b> | µg/L | 3.7              | 100                | 10  | 88    |
| <b>Zn</b> | mg/L | 4.6              | -                  | 5   | -     |
| <b>Al</b> | µg/L | -                | 100                | 8   | 115   |
| <b>As</b> | µg/L | 3.2              | 100                | 15  | 85    |
| <b>Ba</b> | µg/L | -                | 100                | 5   | 118   |
| <b>Be</b> | µg/L | -                | 100                | 5   | 94    |
| <b>Cd</b> | µg/L | -                | 100                | 4   | 82    |
| <b>Co</b> | µg/L | -                | 100                | 3   | 114   |
| <b>Cr</b> | µg/L | -                | 100                | 10  | 108   |
| <b>Fe</b> | µg/L | 165              | 100                | 6   | 120   |
| <b>Hg</b> | µg/L | 0.5              | -                  | 22  | -     |
| <b>Li</b> | µg/L | 1.4              | 100                | 24  | 118   |
| <b>Pb</b> | µg/L | -                | 100                | 4   | 85    |
| <b>Rb</b> | µg/L | 75               | 100                | 5   | 116   |
| <b>Sr</b> | µg/L | 3.5              | 100                | 9   | 114   |
| <b>V</b>  | µg/L | -                | 100                | 9   | 114   |

<sup>1</sup> C<sub>obs</sub>, observed concentration in unfortified blood serum sample<sup>2</sup> C<sub>spike</sub>, known added spiked concentration<sup>3</sup> CV%, mean value of coefficient of variation<sup>4</sup> Rec%, mean recovery based on spiked concentration**Table S8.** Recovery data evaluated on CRMs.

|                  |           |                              |               | This work               |                         |
|------------------|-----------|------------------------------|---------------|-------------------------|-------------------------|
|                  | Unit      | Certified value <sup>1</sup> |               | Mean value <sup>2</sup> | Recovery % <sup>3</sup> |
| <b>BCR - 304</b> | <b>Ca</b> | mmol/L                       | 2.201 ± 0.019 | 2.496 ± 0.255           | 113                     |
| <b>BCR - 304</b> | <b>Mg</b> | mmol/L                       | 1.85 ± 0.03   | 1.67 ± 0.15             | 90                      |
| <b>BCR - 304</b> | <b>Li</b> | mmol/L                       | 0.985 ± 0.029 | 1.126 ± 0.105           | 114                     |
| <b>BCR - 638</b> | <b>Se</b> | µg/L                         | 104 ± 7       | 111 ± 18                | 107                     |
| <b>BCR - 638</b> | <b>Zn</b> | µg/L                         | 1430 ± 210    | 1602 ± 273              | 112                     |

<sup>1</sup> unweighed mean value and expanded uncertainty; <sup>2</sup> unweighed mean value and standard deviation of 5 replicates; <sup>3</sup> unweighed mean value of 5 replicates

**Table S9.** Reference Values and biomonitoring data expressed as µg/L for macro and essential trace elements in blood serum.

|           | WHO [1,2]               |      | ISS 10/22 [3] |      | ISS 11/9 [4]         |      | SIVR [5]                |      |
|-----------|-------------------------|------|---------------|------|----------------------|------|-------------------------|------|
|           | range                   | year | range         | year | range <sup>a,b</sup> | year | range <sup>b</sup>      | year |
| <b>Ca</b> | -                       | -    | 52577 - 70632 | 2005 | -                    | -    | -                       | -    |
| <b>Mg</b> | -                       | -    | 14643 - 20255 | 2005 | -                    | -    | -                       | -    |
| <b>Cu</b> | 800 – 1200 <sup>c</sup> | 1996 | 601 - 1373    | 1990 | -                    | -    | 500 - 1250              | 2005 |
|           | -                       | -    | 648 - 1301    | 2005 | -                    | -    | 600 – 1600 <sup>d</sup> | 2011 |
| <b>Mn</b> | 0.5 - 1                 | 1996 | 0.3 - 0.9     | 1990 | 0.47 - 1.38          | -    | 0.1 - 1.1               | 2005 |
|           | -                       | -    | 0.31 - 1.02   | 2005 | -                    | -    | -                       | -    |
| <b>Ni</b> | < 1 - 2                 | 1996 | 0.10 - 1.25   | 2005 | 0.09 - 0.95          | -    | 0.1 - 1                 | 2005 |
|           | -                       | -    | 0.26 - 0.75   | 2006 | -                    | -    | -                       | -    |
| <b>Se</b> | 75 - 120                | 1996 | 56 - 105      | 1990 | -                    | -    | 50 - 130                | 2005 |
|           | 39 - 197                | 2005 | -             | -    | -                    | -    | -                       | -    |
| <b>Zn</b> | 800 - 1100              | 1996 | 587 - 1215    | 1990 | -                    | -    | 600 - 1080              | 2005 |
|           | -                       | -    | 597 - 1028    | 2005 | -                    | -    | 800 - 1600              | 2011 |

<sup>a</sup> data referred to adults aged between 18 and 35; <sup>b</sup> data expressed as 5° - 95° percentiles; <sup>c</sup> referred to males; <sup>d</sup> referred to adults

**Table S10.** Reference Values and biomonitoring data expressed as µg/L for additional and not essential trace elements in blood serum.

|           | WHO [1,2]   |      | ISS 10/22 [3] |      | ISS 11/9 [4]         |      | SIVR [5]                 |      |
|-----------|-------------|------|---------------|------|----------------------|------|--------------------------|------|
|           | range       | year | range         | year | range <sup>a,b</sup> | year | range <sup>b</sup>       | year |
| <b>Al</b> | -           | -    | 0.03 – 7.5    | 1990 | -                    | -    | 1.0 – 6.0                | 2005 |
|           | -           | -    | 0.43 – 5.29   | 2005 | -                    | -    | -                        | -    |
| <b>As</b> | < 1 - 5     | 1996 | -             | -    | < 0.15 - 2.80        | -    | -                        | -    |
| <b>Ba</b> | -           | -    | 0.32 - 1.37   | 2005 | -                    | -    | 0.2 - 1.2                | 2005 |
| <b>Be</b> | -           | -    | 0.03 - 0.27   | 1990 | < 0.022 - 0.086      | -    | 0.06 - 0.25              | 2005 |
|           | -           | -    | 0.06 - 0.43   | 2005 | -                    | -    | -                        | -    |
| <b>Cd</b> | 0.1 - 0.2   | 1996 | 0.04 - 0.36   | 1990 | 0.032 - 0.272        | -    | 0.1 - 0.15               | 2005 |
|           | -           | -    | 0.03 - 0.20   | 1990 | -                    | -    | -                        | -    |
| <b>Co</b> | -           | -    | 0.08 – 0.4    | 1990 | 0.074 – 0.485        | -    | 0.05 – 0.30              | 2005 |
|           | -           | -    | 0.06 – 0.42   | 2005 | -                    | -    | -                        | -    |
| <b>Cr</b> | 0.14 – 0.15 | 1996 | 0.04 – 0.41   | 1990 | 0.054 – 0.292        | -    | 0.1 – 0.20               | 2005 |
|           | -           | -    | 0.07 – 0.28   | 2005 | -                    | -    | -                        | -    |
| <b>Hg</b> | < 1         | 1996 | 0.6 - 3.8     | 1990 | 0.14 - 1.88          | -    | 0.2 - 1.5                | 2005 |
| <b>Li</b> | 0.2 - 0.8   | 1996 | 0.36 - 2.20   | 2005 | -                    | -    | -                        | -    |
| <b>Pb</b> | < 1         | 1996 | 0.1 - 0.5     | 1990 | 0.05 - 0.68          | -    | 0.05 - 0.35              | 2005 |
|           | -           | -    | 0.20 - 0.98   | 2005 | -                    | -    | 0.01 - 0.25 <sup>c</sup> | 2011 |
| <b>Rb</b> | 0.1 - 0.2   | 1996 | 78 - 317      | 1990 | -                    | -    | -                        | -    |
| <b>Sb</b> | -           | -    | 0.02 - 0.22   | 2005 | 0.028 - 0.340        | -    | -                        | -    |
| <b>Sr</b> | -           | -    | 23.0 - 61.5   | 2005 | -                    | -    | -                        | -    |
| <b>V</b>  | 0.1 - 1.0   | 1996 | 0.07 - 1.1    | 1990 | 0.020 - 0.115        | -    | 0.03 - 0.1               | -    |
|           | -           | -    | 0.03 - 0.11   | 2005 | -                    | -    | -                        | -    |

<sup>a</sup> data referred to adults aged between 18 and 35; <sup>b</sup> data expressed as 5° - 95° percentiles; <sup>c</sup> referred to plasma

**Table S11.** Schematic representation of trace elements found in human semen and their functions.

| Elements | Role / Findings                                                                                         | Ref      |
|----------|---------------------------------------------------------------------------------------------------------|----------|
| Ca       | Steroidogenesis; Acrosome reaction; Hyperactivation; Sperm quality; Chemotaxis                          | [6]      |
| Cu       | Sperm quality                                                                                           | [6–9]    |
| Fe       | Co-factor of Catalase                                                                                   | [7,9,10] |
| K        | Sperm quality; Sperm capacitation                                                                       | [6]      |
| Mg       | Spermatogenesis; Sperm quality                                                                          | [6,9]    |
| Mn       | Sperm quality                                                                                           | [6]      |
| Na       | Spermatogenesis; Acrosome reaction; Sperm quality; Sperm capacitation                                   | [6]      |
| Se       | Spermatogenesis; Sperm quality                                                                          | [6,7]    |
| Zn       | Steroidogenesis; Spermatogenesis; Testicular development; Sperm quality; Sperm capacitation; Chemotaxis | [6–9,11] |
| As       | Spermatogenesis ↓ ; Sperm maturation ↓ ; Sperm motility ↓                                               | [12]     |
| Ba       | Sperm motility ↓                                                                                        | [13]     |
| Be       | Chromosomal aberrations ↑ ; Sperm abnormalities ↑                                                       | [14]     |
| Cd       | Testicular morphology ↓ ; Spermatogenesis ↓ ; Sperm Quality ↓ ; Sperm Morphology ↓                      | [8]      |
| Li       | Sperm motility ↓                                                                                        | [15]     |
| Hg       | Testicular morphology ↓ ; Spermatogenesis ↓ ; Sperm Quality ↓ ; Sperm motility ↓ ; Sperm Morphology ↓   | [16,17]  |
| Ni       | Sperm motility ↑                                                                                        | [18]     |
| Pb       | Testicular morphology ↓ ; Spermatogenesis ↓ ; Sperm Quality ↓ ; Sperm Morphology ↓                      | [8,19]   |
| Sr       | Sperm motility ↑ ; Sperm capacitation ↑ ; Acrosome reaction ↑                                           | [20]     |
| V        | Sperm motility ↓ ; Sperm capacitation ↓                                                                 | [19]     |

An up arrow ( ↑ ) represents an increment of that function, while a down arrow ( ↓ ) represents a decrease of that function.

**Table S12.** Ratio between Zn and Cu in blood serum.

|                    | WRC  | BSC  | LF   | SRV  |
|--------------------|------|------|------|------|
| <b>Zn/Cu Serum</b> | 1,43 | 1,64 | 1,32 | 1,15 |

## References

1. *Trace Elements in Human Nutrition and Health*; World Health Organization, Food and Agriculture Organization of the United Nations, International Atomic Energy Agency, Eds.; World Health Organization: Geneva, 1996; ISBN 978-92-4-156173-0.
2. *Global Health Risks: Mortality and Burden of Disease Attributable to Selected Major Risks*; World Health Organization, Ed.; World Health Organization: Geneva, Switzerland, 2009; ISBN 978-92-4-156387-1.
3. Alimonti, A.; Bocca, B.; Mattei, D.; Pino, A. Biomonitoraggio Della Popolazione Italiana per l'esposizione Ai Metalli: Valori Di Riferimento 1990-2009. Roma:Istituto Superiore Di Sanità (Rapporti ISTISAN 10/22).



- 
4. Alimonti, A.; Bocca, B.; Mattei, D.; Pino, A. Programma per Il Biomonitoraggio Dell'esposizione Della Popolazione Italiana (PROBE): Dose Interna Dei Metalli. Roma: Istituto Superiore Di Sanità (Rapporti ISTISAN 11/9 IT). Available online: [http://old.iss.it/binary/publ/cont/11\\_9IT\\_web.pdf](http://old.iss.it/binary/publ/cont/11_9IT_web.pdf) (accessed on 15 September 2020).
  5. SIVR - Società Italiana Dei Valori Di Riferimento Available online: <http://www.sivr.it/documenti.htm> (accessed on 20 December 2020).
  6. Mirnamniha, M.; Faroughi, F.; Tahmasbpour, E.; Ebrahimi, P.; Harchegani, A.B. An Overview on Role of Some Trace Elements in Human Reproductive Health, Sperm Function and Fertilization Process. *Reviews on Environmental Health* **2019**, *34*, 339–348, doi:10.1515/reveh-2019-0008.
  7. Nenkova, G.; Petrov, L.; Alexandrova, A. Role of Trace Elements for Oxidative Status and Quality of Human Sperm. *Balkan Med J* **2017**, *34*, 343–348, doi:10.4274/balkanmedj.2016.0147.
  8. Sun, J.; Yu, G.; Zhang, Y.; Liu, X.; Du, C.; Wang, L.; Li, Z.; Wang, C. Heavy Metal Level in Human Semen with Different Fertility: A Meta-Analysis. *Biol Trace Elem Res* **2017**, *176*, 27–36, doi:10.1007/s12011-016-0804-2.
  9. Hashemi, M.M.; Behnampour, N.; Nejabat, M.; Tabandeh, A.; Ghazi-Moghaddam, B.; Joshaghani, H.R. Impact of Seminal Plasma Trace Elements on Human Sperm Motility Parameters. *Romanian Journal of Internal Medicine* **2018**, *56*, 15–20, doi:10.1515/rjim-2017-0034.
  10. Rubio-Riquelme, N.; Huerta-Retamal, N.; Gómez-Torres, M.J.; Martínez-Espinosa, R.M. Catalase as a Molecular Target for Male Infertility Diagnosis and Monitoring: An Overview. *Antioxidants* **2020**, *9*, 78, doi:10.3390/antiox9010078.
  11. Verze, P.; Cai, T.; Lorenzetti, S. The Role of the Prostate in Male Fertility, Health and Disease. *Nat Rev Urol* **2016**, *13*, 379–386, doi:10.1038/nrurol.2016.89.
  12. Kim, Y.-J.; Kim, J.-M. Arsenic Toxicity in Male Reproduction and Development Available online: [http://www.ksdb.org/archive/view\\_article?pid=dr-19-4-167](http://www.ksdb.org/archive/view_article?pid=dr-19-4-167) (accessed on 18 December 2020).
  13. Sukhn, C.; Awwad, J.; Ghantous, A.; Zaatari, G. Associations of Semen Quality with Non-Essential Heavy Metals in Blood and Seminal Fluid: Data from the Environment and Male Infertility (EMI) Study in Lebanon. *J Assist Reprod Genet* **2018**, *35*, 1691–1701, doi:10.1007/s10815-018-1236-z.
  14. Fahmy, M.A.; Hassan, N.H.A.; Farghaly, A.A.; Hassan, E.E.S. Studies on the Genotoxic Effect of Beryllium Chloride and the Possible Protective Role of Selenium/Vitamins A, C and E. *Mutation Research/Genetic Toxicology and Environmental Mutagenesis* **2008**, *652*, 103–111, doi:10.1016/j.mrgentox.2007.12.009.
  15. In Vitro Effects of Lithium on Human Sperm Motility. In Proceedings of the International Institute of Chemical, Biological & Environmental Engineering June 5–6, 2015 Istanbul (Turkey); International Institute of Chemical, Biological & Environmental Engineering, June 5 2015.
  16. Björklund, G.; Chirumbolo, S.; Dadar, M.; Pivina, L.; Lindh, U.; Butnariu, M.; Aaseth, J. Mercury Exposure and Its Effects on Fertility and Pregnancy Outcome. *Basic & Clinical Pharmacology & Toxicology* **2019**, *125*, 317–327, doi:https://doi.org/10.1111/bcpt.13264.
  17. Martinez, C.S.; Escobar, A.G.; Torres, J.G.D.; Brum, D.S.; Santos, F.W.; Alonso, M.J.; Salaices, M.; Vassallo, D.V.; Peçanha, F.M.; Leivas, F.G.; et al. Chronic Exposure to Low Doses of Mercury Impairs Sperm Quality and Induces Oxidative Stress in Rats. *J Toxicol Environ Health A* **2014**, *77*, 143–154, doi:10.1080/15287394.2014.867202.
  18. Bian, J.; Shi, X.; Li, Q.; Zhao, M.; Wang, L.; Lee, J.; Tao, M.; Wu, X. A Novel Functional Role of Nickel in Sperm Motility and Eukaryotic Cell Growth. *J Trace Elem Med Biol* **2019**, *54*, 142–149, doi:10.1016/j.jtemb.2019.04.017.
  19. Bae, J.-W.; Im, H.; Hwang, J.-M.; Kim, S.-H.; Ma, L.; Kwon, H.J.; Kim, E.; Kim, M.O.; Kwon, W.-S. Vanadium Adversely Affects Sperm Motility and Capacitation Status via Protein Kinase A Activity and Tyrosine Phosphorylation. *Reproductive Toxicology* **2020**, *96*, 195–201, doi:10.1016/j.reprotox.2020.07.002.
  20. Okada, K.; Palmieri, C.; Della Salda, L.; Vackova, I. Viability, Acrosome Morphology and Fertilizing Capacity of Boar Spermatozoa Treated with Strontium Chloride. *Zygote* **2008**, *16*, 49–56, doi:10.1017/S0967199407004479.
